# Supplementary material for: High-grade diesel production by hydrodeoxygenation of palm oil over a hierarchically structured Ni/HBEA catalyst
Source: Royal Society of Chemistry journal article supplement (doi:10.1039/c4gc02339k), 2014-12-22
Supplement: c4gc02339k1.pdf [file c4gc02339k1.pdf]

## **Supporting Information**

### **High-Grade Diesel Production from Hydrodeoxygenation of Palm Oil over Hierarchically Structured Ni/HBEA Catalyst**

Bing Ma, Chen Zhao\*

Shanghai Key Laboratory of Green Chemistry and Chemical Processes, Department of Chemistry,  
East China Normal University, Shanghai 200062, China

Email: czhao@chem.ecnu.edu.cn

**Table S1.** Physicochemical properties of the used HBEA.

| Zeolite | $S_{\text{BET}}$ [m <sup>2</sup> g <sup>-1</sup> ] <sup>a</sup> |      | $V_{\text{pore}}$ [cm <sup>3</sup> g <sup>-1</sup> ] <sup>a</sup> |      | $\text{Si}/\text{Al}_2$<br>[molmol <sup>-1</sup> ] <sup>b</sup> |
|---------|-----------------------------------------------------------------|------|-------------------------------------------------------------------|------|-----------------------------------------------------------------|
|         | Micro                                                           | Meso | Micro                                                             | Meso |                                                                 |
| HBeta   | 445                                                             | 200  | 0.18                                                              | 0.58 | 22                                                              |

<sup>a</sup> The specific surface areas and pore volumes are determined by N<sub>2</sub> sorption at 77 K.

<sup>b</sup> The Si and Al contents are determined by ICP.

**Table S2.** The properties and activities of diverse Ni/HBeta for catalyzing stearic acid HDO.

| Catalyst                                         | Rate                                     |                                       | $I_{\text{soHC}}/$<br>Total <sub>HC</sub> [%] |
|--------------------------------------------------|------------------------------------------|---------------------------------------|-----------------------------------------------|
|                                                  | [mmol·g <sup>-1</sup> ·h <sup>-1</sup> ] | [g·g <sup>-1</sup> ·h <sup>-1</sup> ] |                                               |
| Ni/HBeta (untreated)                             | 45                                       | 13                                    | 14                                            |
| Ni/HBeta (with TPAOH/NaOH)                       | 67                                       | 19                                    | 15                                            |
| Ni/HBeta (with Na <sub>2</sub> CO <sub>3</sub> ) | 58                                       | 17                                    | 14                                            |
| Ni/HBeta (with steaming)                         | 9                                        | 3                                     | 0                                             |
| Ni/HBeta (with steaming-TPAOH/NaOH)              | 42                                       | 12                                    | 8                                             |
| Ni/HBeta (with CTAB/NaOH)                        | 31                                       | 9                                     | 9                                             |
| Ni/HBeta (DP) <sup>a</sup>                       | 18                                       | 5                                     | 2                                             |

<sup>a</sup> Conditions: 1.0 g stearic acid, 0.2 g catalyst, 100 mL dodecane, 260 °C, 40 bar H<sub>2</sub>, 2 h, stirring at 700 rpm, please see ref. <sup>[1]</sup>

**Table S3.** Fatty acid composition of the used palm oil.

| C <sub>13:0</sub> <sup>a</sup> | C <sub>14:0</sub> | C <sub>15:0</sub> | C <sub>16:1</sub> | C <sub>16:0</sub> | C <sub>17:1</sub> | C <sub>17:0</sub> | C <sub>18:1</sub> | C <sub>18:2</sub> | C <sub>18:0</sub> | C <sub>20:1</sub> | C <sub>20:0</sub> | C <sub>22:0</sub> | C <sub>24:0</sub> |
|--------------------------------|-------------------|-------------------|-------------------|-------------------|-------------------|-------------------|-------------------|-------------------|-------------------|-------------------|-------------------|-------------------|-------------------|
| 0.17                           | 0.88              | 0.03              | 0.21              | 35.96             | 0.02              | 0.06              | 28.76             | 21.14             | 12.23             | 0.14              | 0.29              | 0.04              | 0.05              |

<sup>a</sup> The nomenclature shows the number of carbon atoms and the number of C=C double bonds: for example the alkyl chain of the present fatty acid contains 14 C atoms and no double bonds

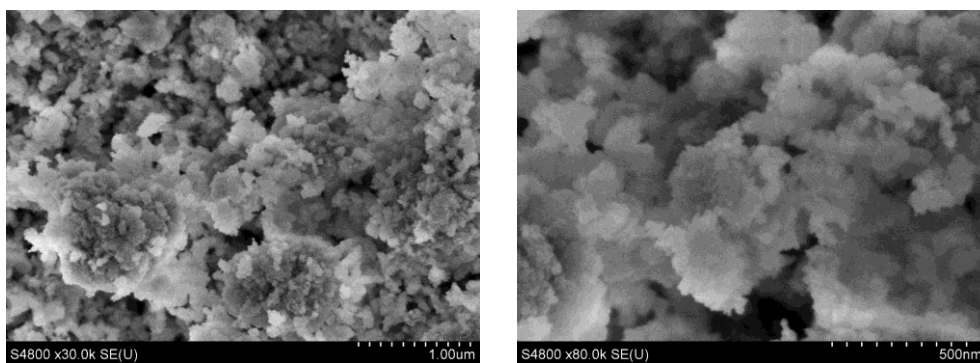

**Figure S1.** SEM images of the used parent HBEA.

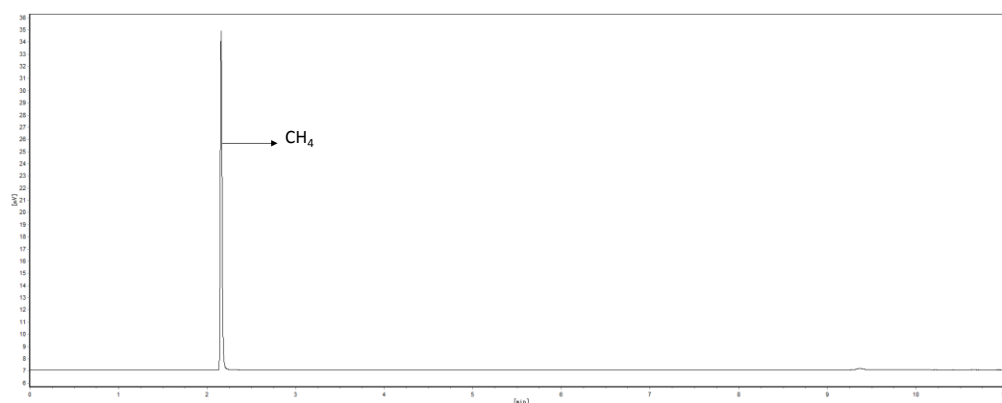

**Figure S2.** GC spectra of gaseous products from stearic acid hydrodeoxygenation. Reaction condition: 5.0 g stearic acid, 0.2 g Ni/HBeta, 80 mL dodecane, 260 °C, 4 MPa H<sub>2</sub>, stirring at 600 rpm.

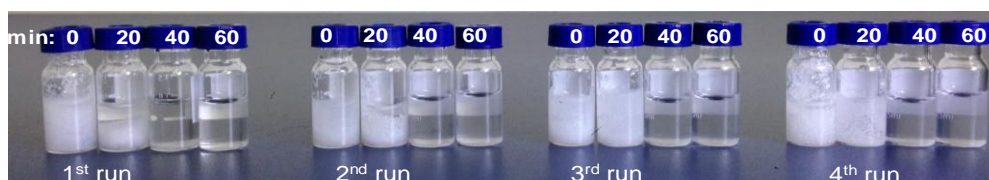

**Figure S3.** Images of four catalyst recycling runs during palm oil upgrading.

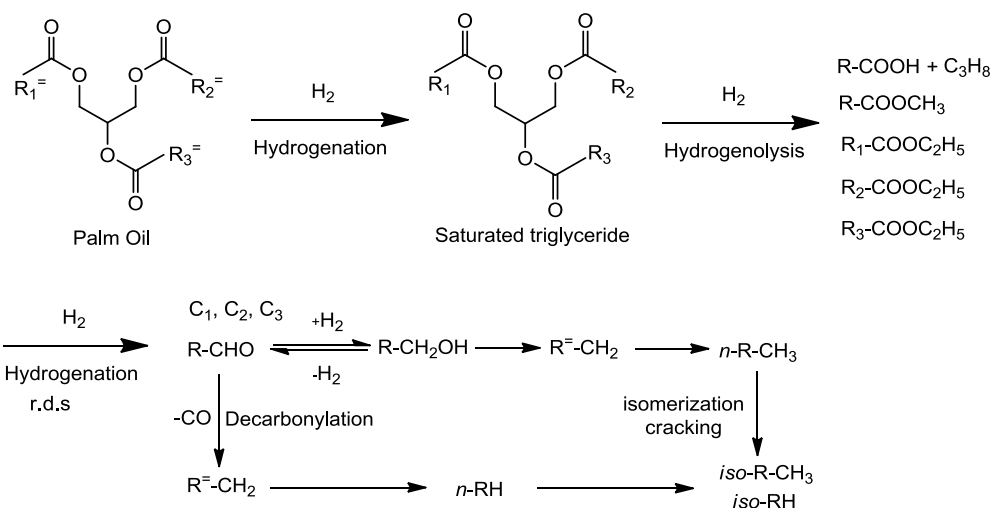

$\text{R}_1^=, \text{R}_2^=, \text{R}_3^=$ : unsaturated alkyl chain (mainly  $\text{C}_{16}$ ,  $\text{C}_{18}$ )

Methanation:  $\text{CO} + \text{H}_2 = \text{CH}_4 + \text{H}_2\text{O}$

**Scheme S1.** Proposed reaction pathways for one-step transformation of palm oil to alkanes over Ni/HBeta.

#### Reference:

1. W. Song, C. Zhao, J. A. Lercher, *Chem. Eur. J.* **2013**, *19*, 9833.
